# Supplementary material for: Mental Health Treatment Provided by Primary Care Psychologists in the Netherlands
Source: Atypon-hosted journal article supplement (doi:10.1176/appi.ps.201100541), 2013-01-01
Supplement: 94_ds001.pdf [file 94_ds001.pdf]

Table 1: Characteristics of primary care psychologists clients in 2010 (N= 55,067)

| <b>Sex</b>                     | <b>N</b> | <b>%</b> | <b>Statistics<br/>Dutch<br/>population</b> |
|--------------------------------|----------|----------|--------------------------------------------|
| Male                           | 19,249   | 35%      | 50%                                        |
| Female                         | 35,817   | 65%      | 50%                                        |
| <b>Age</b>                     |          |          |                                            |
| 0 -18                          | 5,229    | 10%      | 23%                                        |
| 19 – 30                        | 12,858   | 23%      | 15%                                        |
| 31 – 40                        | 13,312   | 24%      | 14%                                        |
| 41 – 50                        | 12,399   | 23%      | 15%                                        |
| 51 – 60                        | 7,753    | 14%      | 13%                                        |
| 61 +                           | 3,412    | 6%       | 20%                                        |
| <b>Marital Status</b>          |          |          |                                            |
| Unmarried                      | 17,759   | 32%      | 47%                                        |
| Married/cohabitating           | 31,461   | 55%      | 42%                                        |
| Divorced                       | 5,549    | 10%      | 6%                                         |
| Widowed                        | 1,274    | 2%       | 5%                                         |
| <b>Education</b>               |          |          |                                            |
| Low                            | 13,067   | 25%      | 23%                                        |
| Middle                         | 20,551   | 39%      | 44%                                        |
| High                           | 18,731   | 36%      | 33%                                        |
| <b>Country of birth</b>        |          |          |                                            |
| Netherlands                    | 50,489   | 92%      | 80%                                        |
| Abroad                         | 4,574    | 8%       | 20%                                        |
| <b>Employment status</b>       |          |          |                                            |
| eEmployed                      | 29,976   | 54%      | -                                          |
| sSelf employed                 | 3,888    | 7%       | -                                          |
| oOut of work/incapacitated     | 9,993    | 18%      | -                                          |
| Pensioner                      | 2,329    | 4%       | -                                          |
| sStudent                       | 7,984    | 15%      | -                                          |
| <b>Request for help</b>        | <b>N</b> | <b>%</b> |                                            |
| Interpersonal problems         | 12,661   | 23%      |                                            |
| Working/school problems        | 4,681    | 9%       |                                            |
| Depressive feelings            | 7,410    | 13%      |                                            |
| Feeling anxious, nervous       | 6,394    | 12%      |                                            |
| Adjustment problems            | 11,505   | 21%      |                                            |
| Identity problems              | 2,388    | 4%       |                                            |
| Psychosomatic problems         | 2,305    | 4%       |                                            |
| Sleeping/eating/sexual/impulse | 1,334    | 2%       |                                            |
| Addiction                      | 320      | 1%       |                                            |
| Other problems in adults       | 1,613    | 3%       |                                            |
| Problems in children           | 4,373    | 8%       |                                            |

Table 2 Diagnoses made by primary care psychologists (N= 55,067)

| <b>Axis 1 Diagnosis<br/>(psychopathology)</b>           | <b>Total population<br/>(N=55,067)</b> |      |
|---------------------------------------------------------|----------------------------------------|------|
| Mood disorder                                           | 10,860                                 | 20%  |
| Anxiety disorder                                        | 8,259                                  | 15%  |
| Adjustment disorder                                     | 12,875                                 | 23%  |
| Somatoform disorder                                     | 1,815                                  | 3%   |
| Impulse control                                         | 1,231                                  | 2%   |
| Sexual/eating/sleep/disorder                            | 1,015                                  | 2%   |
| Delirium, dementia, organic                             | 387                                    | 1%   |
| Substance abuse                                         | 366                                    | 1%   |
| Other Axis 1                                            | 108                                    | 0.2% |
| No <b>Axis 1</b> diagnosis                              | 17,350                                 | 32%  |
|                                                         |                                        |      |
| <b>Axis 2 Diagnosis (personality)</b>                   |                                        |      |
| No disorder, Cluster traits                             | 7,340                                  | 13%  |
| Any <b>Axis 2</b> diagnosis                             | 2,558                                  | 5%   |
| No <b>Axis 2</b> diagnosis or cluster traits            | 45,169                                 | 82%  |
|                                                         |                                        |      |
| <b>Axis 3 Diagnosis (co-morbid<br/>somatic disease)</b> |                                        |      |
| Somatic disease, not interfering with                   | 3,239                                  | 6%   |
| Somatic disease, interfering with ps.                   | 7,955                                  | 14%  |
| No somatic disease                                      | 43,870                                 | 80%  |
|                                                         |                                        |      |
| <b>Axis 4 Diagnosis (psychosocial)</b>                  |                                        |      |
| Problems in primary support group                       | 23,117                                 | 42%  |
| Problems within social context                          | 5,065                                  | 9%   |
| Working problems                                        | 9,210                                  | 17%  |
| Education problems                                      | 1,520                                  | 3%   |
| Social problems                                         | 1,353                                  | 2%   |
| Other psychosocial problems                             | 2,542                                  | 5%   |
| No Axis 4 diagnosis                                     | 12,255                                 | 22%  |

Table 3: Numbers of patients and percentages for three outcome measures and numbers and percentages for regularly concluded cases only. (2010; N= 55,067)

|                                                 |        |     | <b><i>If regularly concluded<br/>(N=40,378)</i></b> |     |
|-------------------------------------------------|--------|-----|-----------------------------------------------------|-----|
| <b>Conclusion of treatment:</b>                 | N      | %   | N                                                   | %   |
| Regular                                         | 40,378 | 73% | -                                                   | -   |
| Interrupted                                     | 7,042  | 13% | -                                                   | -   |
| Referral                                        | 7,647  | 14% | -                                                   | -   |
| <b>Improvement (Difference GAF score T2-T1)</b> |        |     |                                                     |     |
| DecreasedDeterioration                          | 451    | 1%  | 213                                                 | 1%  |
| Equal                                           | 11,985 | 22% | 4,971                                               | 12% |
| < 10 points improvement                         | 16,959 | 31% | 12,730                                              | 32% |
| > 10 points improvement                         | 25,670 | 47% | 22,462                                              | 56% |
| <b>Number of sessions</b>                       |        |     |                                                     |     |
| ≤ 8 sessions                                    | 40331  | 73% | 28,513                                              | 71% |
| 9 - 12 sessions                                 | 9226   | 17% | 7,468                                               | 18% |
| 13 - 20 sessions                                | 4,561  | 8%  | 3,650                                               | 9%  |
| > 20 sessions                                   | 936    | 2%  | 742                                                 | 2%  |
